# Supplementary material
Source: publisher figshare collection journal article supplement (https://karger.figshare.com/ndownloader/files/22384671)
Supplement: Supplementary file 1 [file 22384671]

**SUPPLEMENTAL MATERIAL**

Blood pressure and anticoagulation reversal management during off-hours in oral anticoagulation-associated intracerebral hemorrhage

Anne Mrochen1, MD; Maximilian I. Sprügel1, MD; Stefan T. Gerner1, MD; Jochen A. Sembill, MD; Stefan Lang2, MD; Hannes Lücking2, MD; Joji B. Kuramatsu1, MD & Hagen B. Huttner1*, MD, PhD

1 Department of Neurology, University of Erlangen-Nuremberg, Schwabachanlage 6, 91054 Erlangen, Germany

2 Department of Neuroradiology, University of Erlangen-Nuremberg, Schwabachanlage 6, 91054 Erlangen, Germany

**Correspondence:**Hagen B. Huttner, Department of Neurology, University of Erlangen-Nuremberg,

E-mail: [Hagen.Huttner@uk-erlangen.de](mailto:Hagen.Huttner@uk-erlangen.de)

**Table 1.**

|  | **On-hour**  **(n=423)** | **Off-hour**  **(n=423)** | **p-value** |
| --- | --- | --- | --- |
| Age, years (IQR) | 76 (71-81) | 76 (70-81) | 0.20 |
| Female Sex, n (%) | 172 (40.7) | 183 (43.3) | 0.44 |
| Prior comorbidities |  |  |  |
| Hypertension, n (%) | 368 (87.0) | 378 (89.4) | 0.29 |
| Diabetes mellitus, n (%) | 134 (31.7) | 133 (31.4) | 0.94 |
| Prior stroke/TIA, n (%) | 132 (31.2) | 123 (29.1) | 0.50 |
| Congestive heart failure, n (%) | 72 (17.0) | 75 (17.7) | 0.79 |
| Abnormal kidney function, n (%) | 99 (23.5) | 98 (23.3) | 0.95 |
| Abnormal liver function, n (%) | 8 (1.9) | 13 (3.1) | 0.27 |
| Premorbid mRS (IQR) | 0 (0-1) | 0 (0-1) | 0.46 |
| APT, n (%) | 38 (9.0) | 52 (12.3) | 0.19 |
|  |  |  |  |
| Admission status |  |  |  |
| Temperature, °C (IQR) | 36 (36-37) | 36 (36-37) | 0.62 |
| GCS (IQR) | 14 (11-15) | 13 (11-15) | 0.21 |
| NIHSS (IQR) | 11 (5-19) | 11 (5-19) | 0.18 |
| Symptom onset to admission, min (IQR) | 98 (60-235) | 107 (60-276) | 0.53 |
| Mechanical ventilation, n (%) | 153 (36.2) | 155 (36.6) | 0.87 |
| Initial INR (IQR) | 3.0 (2.0-3.0) | 3.0 (2.0-3.0) | 0.95 |
|  |  |  |  |
| Initial Imaging |  |  |  |
| ICH volume, cm3 (IQR) | 12.6 (5.3-33.0) | 14.3 (5.6-36.0) | 0.31 |
| Intraventricular hemorrhage, n (%) | 168 (39.7) | 171 (40.4) | 0.83 |
| Location, n (%) |  |  |  |
| Deep | 195 (46.1) | 210 (49.6) | 0.30 |
| Cerebellar | 36 (8.5) | 44 (10.4) | 0.35 |
| Brainstem | 19 (4.5) | 13 (3.1) | 0.28 |

**Table I. Characteristics of the cohort of VKA-ICH patients after propensity score matching separated for admission during on- or off-hour.**

Scales, scores and abbreviations: APT: antiplatelet therapy, Glasgow Coma Scale (range 3-15, deep coma to alert), ICH: intracerebral hemorrhage, INR: international normalized ratio, IQR: interquartile range, NIHSS: National Institutes of Health Stroke Scale (ranging from 0, no deficit, -40, severe neurological deficit; 40 is the maximum because in comatose ataxia is not scored), premorbid mRS: modified Rankin Scale prior to admission (range 0-5, no functional deficit to severe disability), TIA: transient ischemic attack, VKA: vitamin K antagonist,

Number (n) given for patients with available data, n (%), IQR; 25th -75th percentile.
